# Supplementary material
Source: PubMed Central journal article supplement (PMC2287369)
Supplement: plntphys_pp.107.114710_1.pdf [file plntphys_pp.107.114710_1.pdf]

## Supplemental table I. Function of the root ion transporter genes investigated

| Gene family/Gene name     | Function                                                                 | References                                     |
|---------------------------|--------------------------------------------------------------------------|------------------------------------------------|
| <b>NRT2</b>               |                                                                          |                                                |
| NRT2.1 (At1g08090)        | High affinity nitrate transporter involved in root uptake                | Filleur et al. (2001) ; Orsel et al. (2006)    |
| NRT2.4 (At5g60770)        | Putative nitrate transporter expressed in roots                          | Orsel et al. (2002)                            |
| <b>PTR</b>                |                                                                          |                                                |
| NRT1.1 (At1g12110)        | Dual affinity nitrate transporter involved in root uptake                | Tsay et al. (1993); Liu et al.(1999)           |
| NRT1.5 (At1g32450)        | Putative nitrate transporter                                             |                                                |
| At3g16180                 | Oligopeptide transporter                                                 |                                                |
| At3g21670                 | Oligopeptide transporter                                                 |                                                |
| At5g62680                 | Oligopeptide transporter                                                 |                                                |
| At1g59740                 | Oligopeptide transporter                                                 |                                                |
| <b>AMT</b>                |                                                                          |                                                |
| AMT1.3 (At3g24300)        | High affinity ammonium transporter involved in root uptake               | Gazzarrini et al. (1999) ; Loque et al. (2006) |
| <b>PHT</b>                |                                                                          |                                                |
| PHT 3.1 (At5g14040)       | Putative phosphate transporter                                           |                                                |
| PHT 1.4 AtPT2 (At2g38940) | High affinity phosphate transporter involved in root uptake              | Shin et al. (2004) ; Misson et al. (2004)      |
| <b>SULTR</b>              |                                                                          |                                                |
| SULTR3.5 (At5g19600)      | Low affinity sulfate transporter involved in root to shoot translocation | Kataoka et al. (2004)                          |
| SULTR1.1 (At4g08620)      | High affinity sulfate transporter likely involved in root uptake         | Takahashi et al. (2000)                        |
| <b>ZIP</b>                |                                                                          |                                                |
| ZIP11 (At1g55910)         | Metal transporter                                                        | Guerinot (2000); Mäser et al.(2001)            |
| <b>HAK/KUP</b>            |                                                                          |                                                |
| KUP2 (At2g40540)          | High affinity potassium transporter                                      | Kim et al. (1998)                              |
| HAK5 (At4g13420)          | High affinity potassium transporter likely involved in root uptake       | Gierth et al. (2005)                           |
| <b>CNGC</b>               |                                                                          |                                                |
| CNGC11 (At2g46440)        | Cation channel involved in pathogen resistance responses                 | Yoshioka et al. (2006)                         |
| <b>NRAMP</b>              |                                                                          |                                                |
| NRAMP4 (At5g67330)        | Iron transporter involved in mobilisation of vacuolar iron               | Lanquar et al. (2005)                          |
| <b>YSL</b>                |                                                                          |                                                |
| YSL4 (At5g41000)          | Putative metal transporter                                               | DiDonato et al. (2004)                         |
| <b>Shaker-like</b>        |                                                                          |                                                |
| AKT2 (At4g22200)          | Potassium channel involved in phloem transport                           | Deeken et al. (2000)                           |

### Supplemental references:

DiDonato et al. (2004) *Plant J* **39**: 403-414; Gierth et al. (2005) *Plant Physiol* **137**: 1105-1114; Guerinot (2000) *Biochim Biophys Acta* **1465**: 190-198; Kataoka et al. (2004) *Plant Physiol* **136**: 4198-4204; Kim et al. (1998) *Plant Cell* **10**: 51-62; Lanquar et al. (2005) *Embo J* **24**: 4041-4051; Liu et al. (1999) *Plant Cell* **11**: 865-874 ; Loque et al. (2006) *Plant J* **48**: 522-534; Mäser et al. (2001) *Plant Physiol* **126**: 1646-1667; Misson et al. (2004) *Plant Mol Biol* **55**: 727-741; Orsel et al. (2002) *Plant Physiol* **129**: 886-896; Shin et al. (2004) *Plant J* **39**: 629-642; Takahashi et al. (2000) *Plant J* **23**: 171-182; Yoshioka et al. (2006) *Plant Cell* **18**: 747-763
